# Supplementary material
Source: PubMed Central journal article supplement (PMC6581180)
Supplement: AEM.00120-19-s0001.pdf [file AEM.00120-19-s0001.pdf]

1 **Supplemental Material**

2

3 **Synthesis of D-amino acid-containing dipeptides using adenylation domains of**  
4 **nonribosomal peptide synthetase**

5

6 Soichiro Kano,<sup>a</sup> Shin Suzuki,<sup>a</sup> Ryotaro Hara (ORCID: 0000-0003-0553-3837),<sup>b\*</sup> Kuniki

7 Kino<sup>a,b,#</sup> (ORCID : 0000-0003-2367-3876)

8

9 <sup>a</sup>Department of Applied Chemistry, Faculty of Science and Engineering, Waseda

10 University, Tokyo 169-8555, Japan, <sup>b</sup>Research Institute for Science and Engineering,

11 Waseda University, Tokyo, 169-8555, Japan

12

13

14

15 **Substrate specificities of the targeted adenylation domains.**

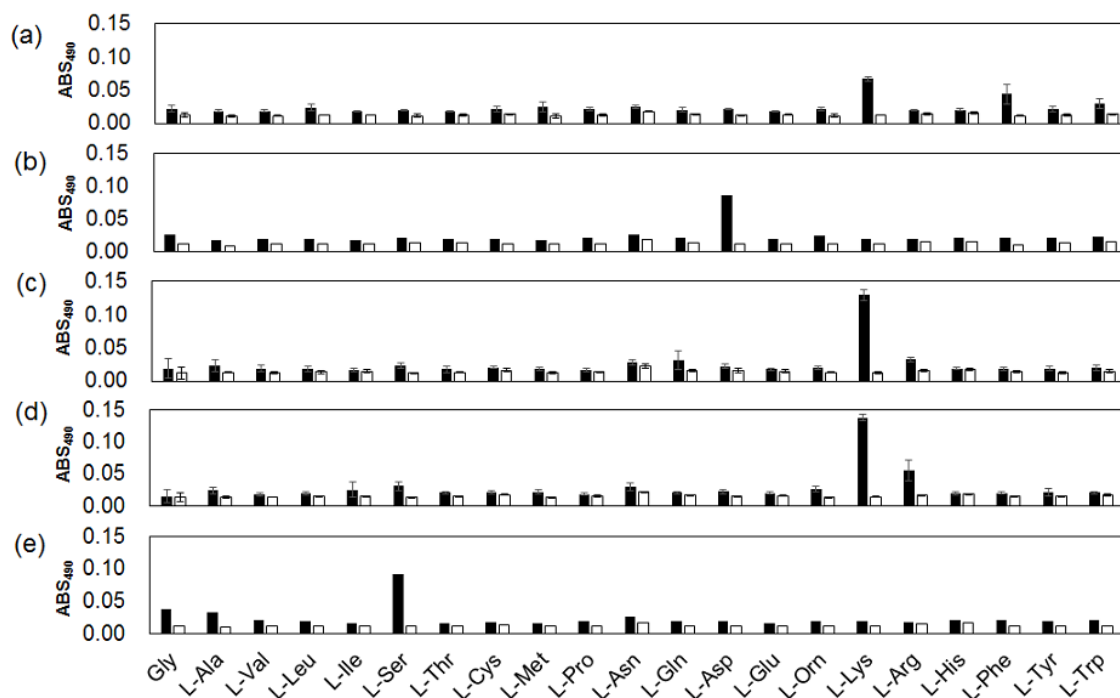

16

17 **FIG. S1.** Substrate specificity of BacB2-A (a), BacC4-A (b), PbtA1-A (c), PbtB2-A (d),  
18 and PbtB3-A (e) toward L-amino acids. Filled bars indicate the absorbance of the reaction  
19 mixture with enzymes and open bars indicate that of the reaction mixture without  
20 enzymes. Error bar indicate the standard deviation based on the results of three  
21 independent experiments.

22

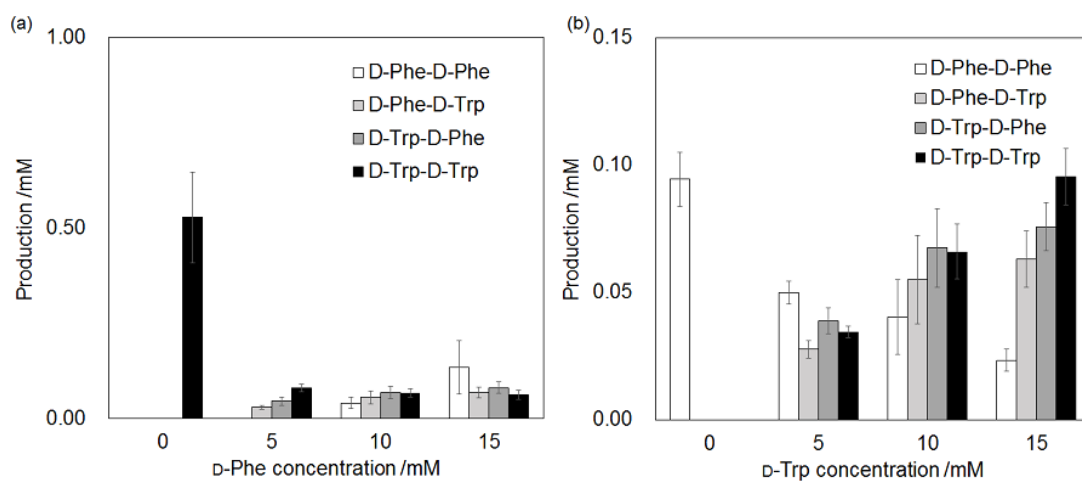

24

25 **FIG. S2.** The relation between the concentration of substrates and the production of the  
 26 dipeptides. Panel (a) indicates the dipeptide production in the mixture containing 10 mM  
 27 D-Trp and 0, 5, 10, 15 mM D-Phe, and panel (b) indicates the dipeptide production in the  
 28 mixture containing 10 mM D-Phe and 0, 5, 10, 15 mM D-Trp. Error bars indicate the  
 29 standard deviation based on the results of three independent experiments.

30

31

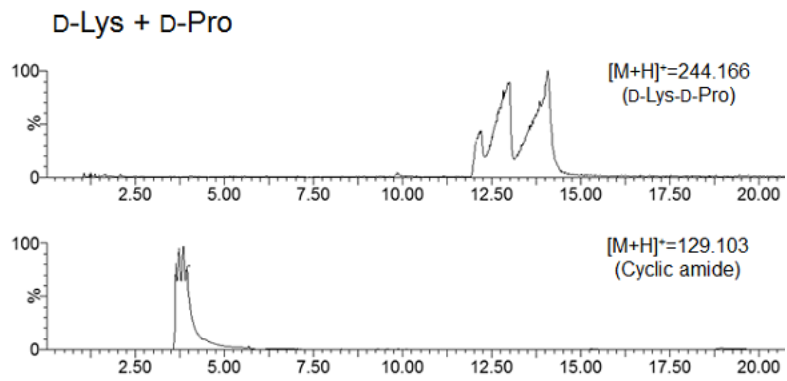

32

33 **FIG. S3.** Activity evaluation of BacB2-A toward D-Lys. LC-MS chromatograms of the

34 reaction mixture containing D-Lys with D-Pro.

35

36

37

38 **SDS-PAGE analysis.**

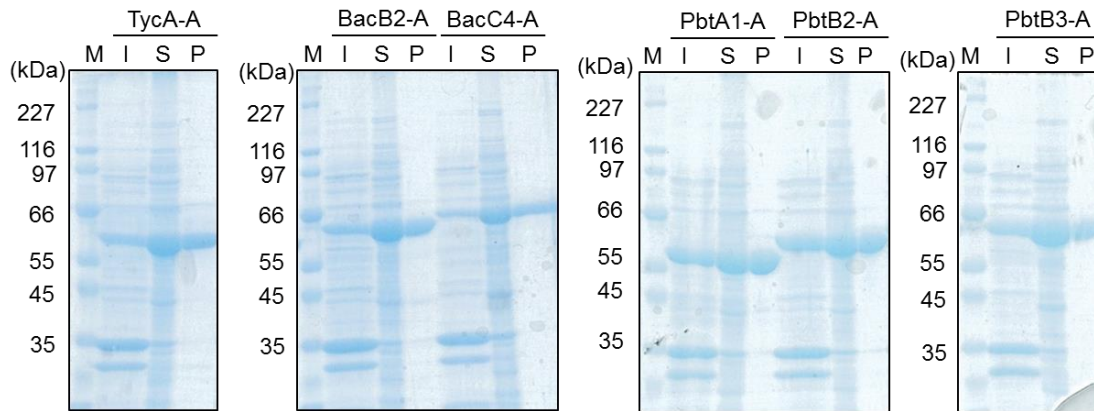

39

40 **FIG. S4.** SDS-PAGE analysis. Each letter indicates the fraction as following: M, Marker;  
41 I, insoluble fraction; S, soluble fraction; P, purified enzyme.

42
